# Supplementary material for: How Psychological Variables Maybe Correlated with Willingness to Get COVID-19 Vaccine: A Nationwide Cross-Sectional Study of Polish Novice Nurses
Source: Int J Environ Res Public Health. 2022 Nov 27;19(23):15787. doi: 10.3390/ijerph192315787 (PMC9740348; doi:10.3390/ijerph192315787)
Supplement: Supplementary file 1 [file ijerph-19-15787-s001.zip › ijerph-1955722-supplementary.pdf]

**Table S1.** Characteristics of the study groups.

|                                                                         | G1 (N = 98)  | G2 (N = 47)  |
|-------------------------------------------------------------------------|--------------|--------------|
| Medical University, N (%)                                               |              |              |
| Pomeranian Medical University                                           | 19 (19.4)    | 13 (27.7)    |
| Poznan University of Medical Sciences                                   | 8 (8.2)      | 13 (27.7)    |
| Wroclaw Medical University                                              | 12 (12.2)    | 3 (6.4)      |
| Jagiellonian University Medical College                                 | 14 (14.3)    | 4 (8.5)      |
| Medical University of Lublin                                            | 16 (16.3)    | 1 (2.1)      |
| Medical University of Białystok                                         | 11 (11.2)    | 5 (10.6)     |
| Medical University of Warsaw                                            | 5 (5.1)      | 2 (4.3)      |
| Medical University of Gdańsk                                            | 6 (6.1)      | 3 (6.4)      |
| Gender, N (%)                                                           |              |              |
| female                                                                  | 95 (96.9)    | 46 (97.9)    |
| male                                                                    | 3 (3.1)      | 1 (2.1)      |
| Age (years)                                                             |              |              |
| M ± SD                                                                  | 23.31 ± 0.92 | 23.38 ± 0.94 |
| range                                                                   | 22.0-25.0    | 22.0-25.0    |
| Working in a hospital with COVID-19 units, N (%)                        |              |              |
| no                                                                      | 66 (67.3)    | 33 (70.2)    |
| yes                                                                     | 32 (32.7)    | 14 (29.8)    |
| Residence, N (%)                                                        |              |              |
| alone                                                                   | 20 (20.4)    | 7 (14.9)     |
| with relatives / family / friends (excluding seniors)                   | 69 (70.4)    | 37 (78.7)    |
| with relatives / family / friends (including seniors)                   | 9 (9.2)      | 3 (6.4)      |
| Living with a person at a higher risk of COVID-19, N (%)                |              |              |
| no                                                                      | 82 (83.7)    | 39 (83.0)    |
| yes                                                                     | 16 (16.3)    | 8 (17.0)     |
| Infection with COVID-19 from people in the immediate environment, N (%) |              |              |
| yes, acute or very acute                                                | 22 (22.4)    | 15 (31.9)    |
| yes, but rather mild                                                    | 53 (54.1)    | 25 (53.2)    |
| no                                                                      | 19 (19.4)    | 6 (12.8)     |
| I do not know                                                           | 4 (4.1)      | 1 (2.1)      |
| COVID-19 infection, N (%)                                               |              |              |
| yes (acute symptoms of infection)                                       | 2 (2.0)      | 4 (8.5)      |
| yes (mild symptoms of infection)                                        | 23 (23.5)    | 11 (23.4)    |
| yes (no symptoms of infection)                                          | 5 (5.1)      | 0 (0.0)      |
| probably (no test confirmation)                                         | 9 (9.2)      | 9 (19.1)     |
| no                                                                      | 42 (42.9)    | 19 (40.4)    |
| I do not know                                                           | 17 (17.3)    | 4 (8.5)      |

M – mean, SD – standard deviation.

G1 – low level of anxiety and high self-efficacy and resilient coping, G2 – high level of anxiety with poor self-efficacy and resilient coping.
